# Supplementary material for: Cyclooxygenases, microsomal prostaglandin E synthase-1, and cardiovascular function
Source: JCI journal article supplement (doi:10.1172/jci27540), 2006-04-13
Supplement: sd1 [file 1]

Supplementary Figure 1

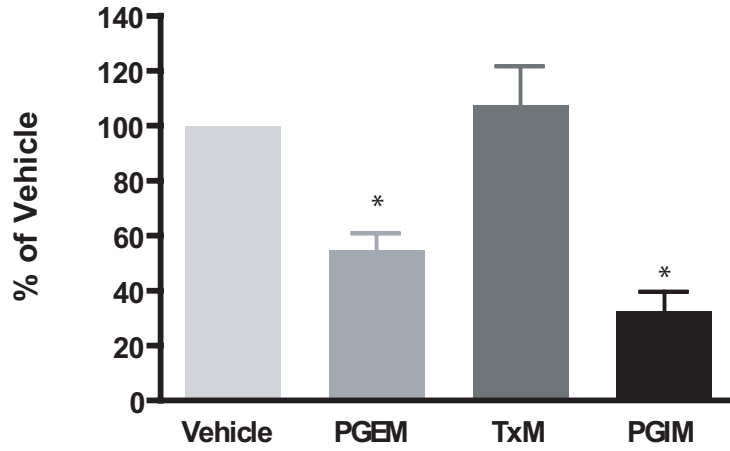

Supplementary Figure 2

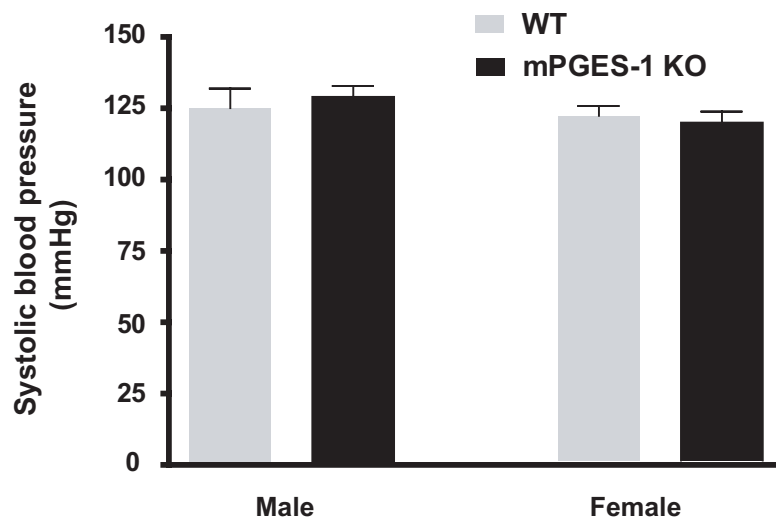

## **SUPPLEMENTARY FIGURE LEGEND.**

**Figure 1. Suppression of PGHS-2 derived prostaglandins.** Inhibition of PGHS-2 with DFU in male WT mice (mixed DBA/11acJ x C57BL/6 genetic background) suppresses significantly PGEM ( $26.2 \pm 3.3$  ng/mg creatinine in vehicle treated group vs  $17.2 \pm 2.5$  ng/mg creatinine in DFU treated group) and 2,3-dinor 6-keto PGF1 $\alpha$  (PGIM) ( $1.6 \pm 0.4$  ng/mg creatinine in vehicle treated group vs  $0.6 \pm 0.1$  ng/mg creatinine in DFU treated group), but not 2,3-dinor TxB2 (TxM) ( $87.2 \pm 10.9$  ng/mg creatinine in vehicle treated group vs  $89.7 \pm 11.8$  ng/mg creatinine in the DFU treated group). \*  $P < 0.05$  compared with pretreatment values; 9 to 13 animals in each group.

**Figure 2. mPGES-1 deletion fails to alter blood pressure in mice.** Tail cuff measurement of systolic blood pressure fails to reveal an impact of mPGES-1 deletion compared to WT controls in male or female mice on a mixed DBA/11acJ x C57BL/6 genetic background. Mice were treated with normal salt diet (0.6% NaCl, n = 12 for each group).
